# Supplementary figures and images for: The Global Spread Pattern of Rat Lungworm Based on Mitochondrial Genetics
Source: MDPI journal article supplement (doi:10.3390/pathogens12060788), 2023-05-31

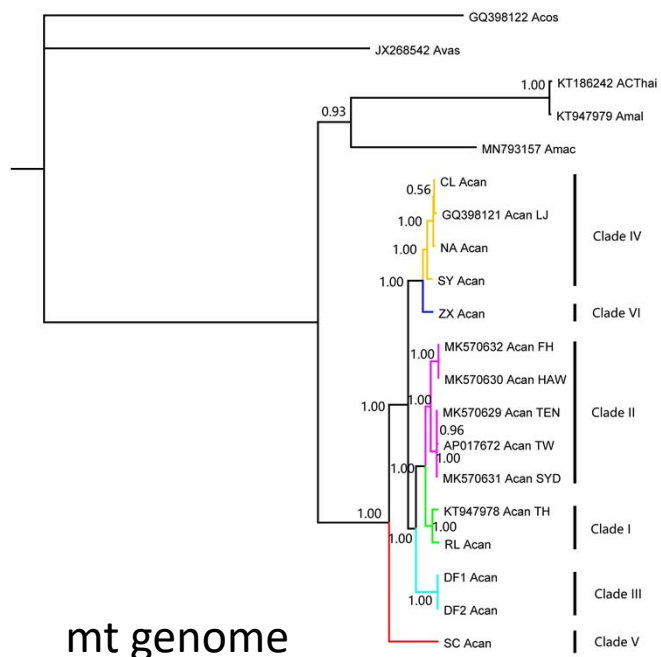

mt genome

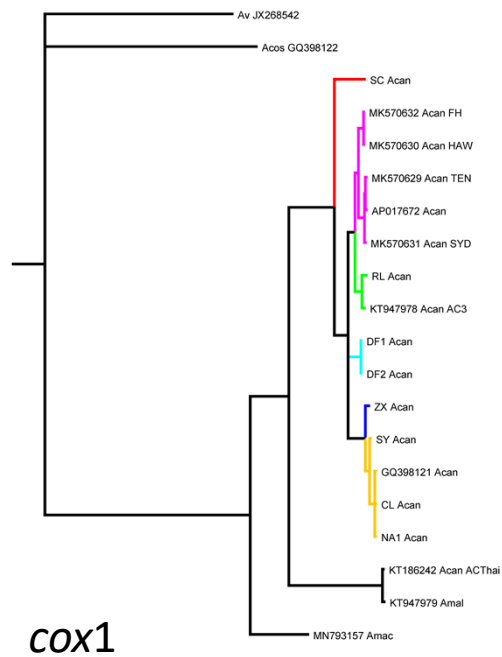

cox1

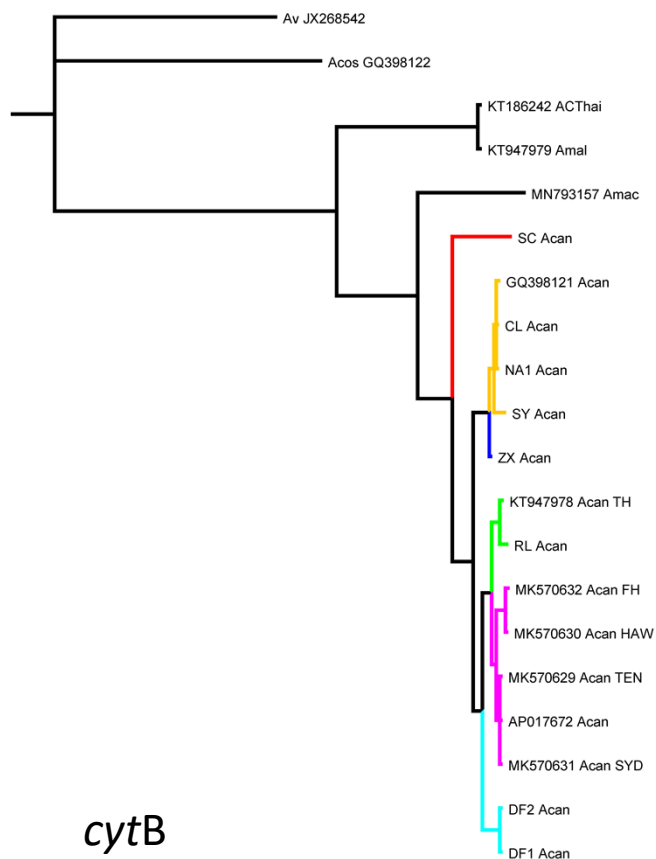

cytB

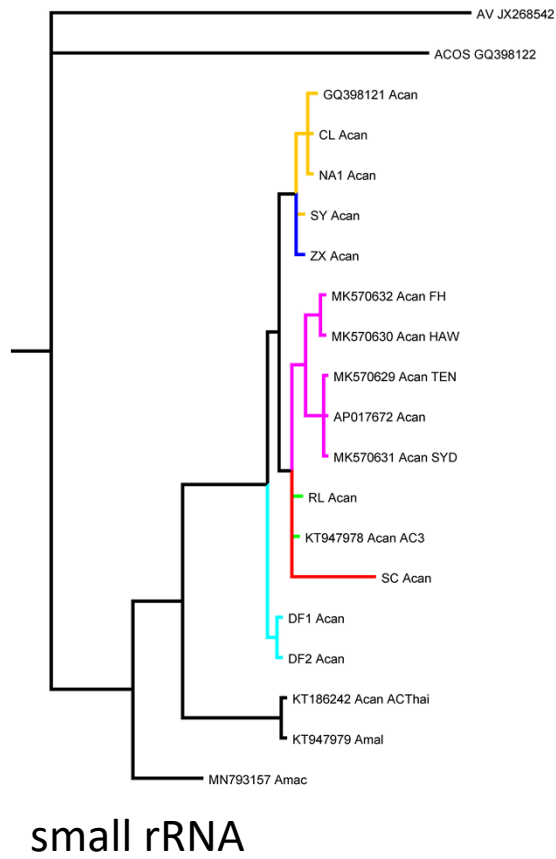

small rRNA

Supplement: s1 [file s1]
